# Supplementary material for: Elevation of endocannabinoids in the brain by synthetic cannabinoid JWH-018: mechanism and effect on learning and memory
Source: Springer Nature journal article supplement (doi:10.1038/s41598-019-45969-4), 2019-07-03
Supplement: MOESM1 [file 41598_2019_45969_MOESM1_ESM.pdf]

Elevation of endocannabinoids in the brain by synthetic cannabinoid JWH-018: the  
mechanism and the effect on learning and memory

Ren-shi Li<sup>a,b</sup>, Ryo Fukumori<sup>c</sup>, Tomoki Takeda<sup>a</sup>, Yingxia Song<sup>a</sup>, Satoshi Morimoto<sup>d</sup>, Ruri  
Kikura-Hanajiri<sup>e</sup>, Taku Yamaguchi<sup>c</sup>, Kazuhito Watanabe<sup>f</sup>, Kousuke Aritake<sup>f</sup>, Yoshitaka  
Tanaka<sup>g</sup>, the late Hideyuki Yamada<sup>a†</sup>, Tsuneyuki Yamamoto<sup>c</sup>, Yuji Ishii<sup>a\*</sup>

<sup>a</sup> *Laboratory of Molecular Life Sciences, Graduate School of Pharmaceutical Sciences,  
Kyushu University; 3-1-1 Maidashi, Higashi-ku, Fukuoka 812-8582, Japan*

<sup>b</sup> *Research Department of Pharmacognosy, China Pharmaceutical University, Nanjing  
211198, People's Republic of China*

<sup>c</sup> *Department of Pharmacotherapeutics and Neuropsychopharmacology, Faculty of  
Pharmaceutical Sciences, Nagasaki International University, Sasebo, Nagasaki, Japan*

<sup>d</sup> *Division of Pharmacognosy, Graduate School of Pharmaceutical Sciences, Kyushu  
University, 3-1-1 Maidashi, Higashi-ku, Fukuoka 812-8582, Japan*

*<sup>e</sup>Division of Pharmacognosy, Phytochemistry and Narcotics, National Institute of Health Sciences (NIHS), 3-25-26 Tonomachi, Kawasaki-ku, Kawasaki-city, Kanagawa210-9501, Japan*

*<sup>f</sup>Daiichi University of Pharmacy, 22-1 Tamagawa-cho, Minami-ku Fukuoka 815-8511 Japan*

*<sup>g</sup>Division of Pharmaceutical Cell Biology, Graduate School of Pharmaceutical Sciences, Kyushu University, 3-1-1 Maidashi, Higashi-ku, Fukuoka 812-8582, Japan*

†Deceased

\*Corresponding author

Phone: +81-92-642-6586.

FAX: +81-92-642-6588.

E-mail: [ishii@phar.kyushu-u.ac.jp](mailto:ishii@phar.kyushu-u.ac.jp)

**Supplemental Table 1. Suggested components the levels of which were altered by JWH-018 treatment or JWH-018 co-administration of AM251 in the brain of male mice.**

| Representative components altered by JWH-018 |                       |                            |     |
|----------------------------------------------|-----------------------|----------------------------|-----|
| sample                                       | Increased             | Decreased                  |     |
| Control vs. JWH-018                          | glutamic acid         | <i>N</i> -acetyl-aspartate |     |
|                                              | 2-AG                  |                            |     |
|                                              | AEA                   |                            |     |
|                                              | succinic acid         |                            |     |
|                                              | acetylcarnitine       |                            |     |
|                                              | AMP                   |                            |     |
|                                              | glutathione disulfide |                            |     |
|                                              | phenylalanine         |                            |     |
|                                              | glutamine             |                            |     |
|                                              | tyrosine              |                            |     |
|                                              | glucose               |                            | AEA |
|                                              | myoinositol           |                            |     |

**Supplemental Table 2. Calibration curves of tested endocannabinoids.**

| Compound | Linear equation        | r <sup>2</sup> |
|----------|------------------------|----------------|
| AEA      | $y = 8.0879x + 127.4$  | 0.99934        |
| 2-AG     | $y = 19.006x + 18.958$ | 0.99896        |

**Supplemental Table 3. Primer pairs used for real-time RT-PCR for the quantification of mRNA.**

| Targets         | Forward primer (5'→3')<br>Reverse primer (5'→3') | Size of product (bp) | Accession No <sup>a</sup> |
|-----------------|--------------------------------------------------|----------------------|---------------------------|
| FAAH            | ttcagaggccttgctgctc<br>actcccagccttcccag         | 111                  | NC_000070                 |
| phospholipase D | tgttggtgcctcagcggag<br>ccatgtccctcggcgagaag      | 165                  | NC_000071                 |
| MAGL            | cgcagtagtctggctctagc<br>atcctgcaggggtcttagg      | 103                  | NC_000072                 |
| DAG             | gtgatcagtatccggggaac<br>ccgtaccatgagagtcgact     | 131                  | NC_000085                 |
| BDNF            | tggcctaacaatgtttgcagat<br>ccactcagaaattcctcctgct | 155                  | NC_005102                 |
| β-actin         | gattactgctctggctccta<br>tcctgcttctgatccac        | 135                  | NM_007393                 |

<sup>a</sup> The GenBank accession numbers are shown.

Abbreviations used are: FAAH, fatty acid amide hydrolase; phospholipase D, *N*-acyl-phosphatidylethanolamines-hydrolyzing; phospholipase D; MAGL, monoacylglycerol lipase; DAG, diacylglycerol and BDNF, brain-derived neurotrophic factor.

**Supplementary Figure S1. Full-length blots of Figure 7**

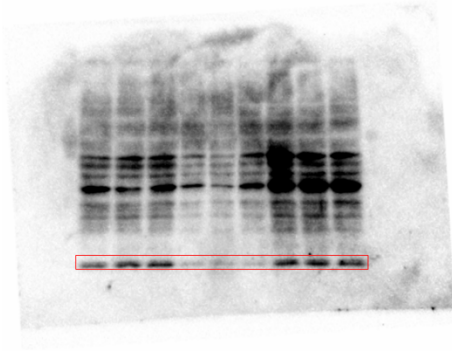

 **BDNF**
